# Supplementary material for: Efficacy of one time per day, single-inhaler indacaterol/glycopyrronium/mometasone in patients with inadequately controlled asthma: post hoc analysis of IRIDIUM study in Asian population
Source: HighWire-hosted journal article supplement (doi:10.1136/bmjresp-2020-000856), 2021-03-01
Supplement: bmjresp-2020-000856supp002_data_supplement.pdf [file bmjresp-2020-000856supp002_data_supplement.pdf]

Colour image\_Supplementary Figures S1.tif

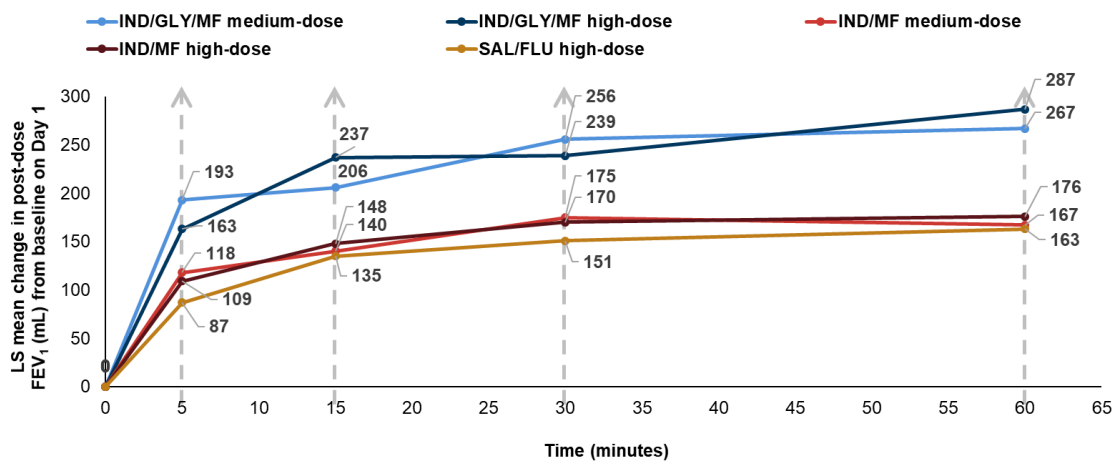

|                                             |                                               |                                               |                                               |                                               |
|---------------------------------------------|-----------------------------------------------|-----------------------------------------------|-----------------------------------------------|-----------------------------------------------|
| IND/GLY/MF medium-dose vs SAL/FLU high-dose | $\Delta$ , 107 mL (56 to 157 mL), $P < 0.001$ | $\Delta$ , 71 mL (20 to 122 mL), $P = 0.006$  | $\Delta$ , 105 mL (54 to 155 mL), $P < 0.001$ | $\Delta$ , 104 mL (54 to 155 mL), $P < 0.001$ |
| IND/GLY/MF high-dose vs SAL/FLU high-dose   | $\Delta$ , 76 mL (25 to 126 mL), $P = 0.003$  | $\Delta$ , 102 mL (51 to 152 mL), $P < 0.001$ | $\Delta$ , 88 mL (38 to 139 mL), $P < 0.001$  | $\Delta$ , 124 mL (73 to 174 mL), $P < 0.001$ |
