# Supplementary figures and images for: Efficacy of one time per day, single-inhaler indacaterol/glycopyrronium/mometasone in patients with inadequately controlled asthma: post hoc analysis of IRIDIUM study in Asian population
Source: HighWire-hosted journal article supplement (doi:10.1136/bmjresp-2020-000856), 2021-03-01

Pages from Figures-5.tif

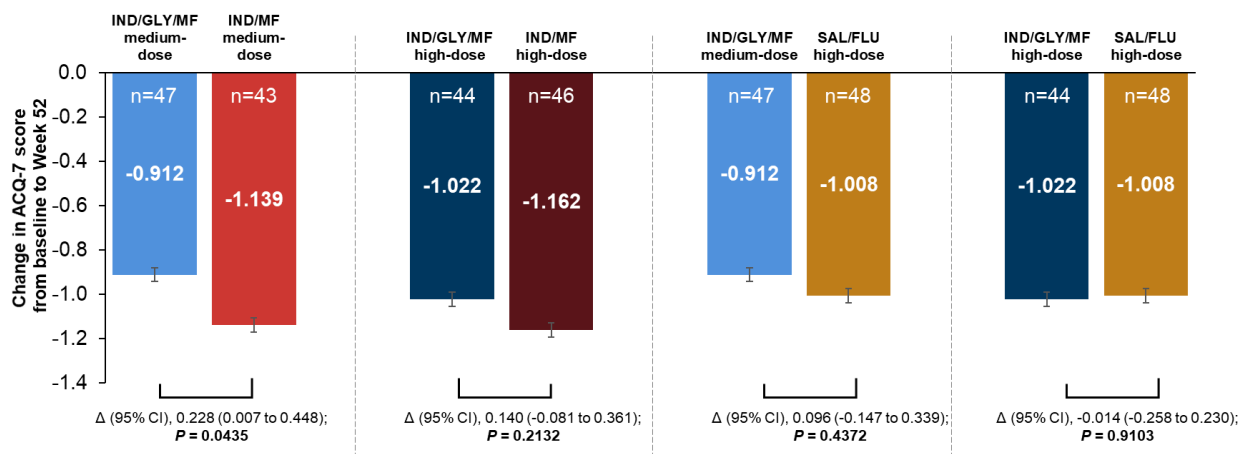

Supplement: bmjresp-2020-000856supp003_data_supplement.pdf [file bmjresp-2020-000856supp003_data_supplement.pdf]
